# Supplementary material
Source: Springer Nature journal article supplement (https://www.springermedizin.de/resource/supplementary/12889_2010_1976_MOESM1_ESM.pdf/9486446)
Supplement: MOESM1 [file 9486446]

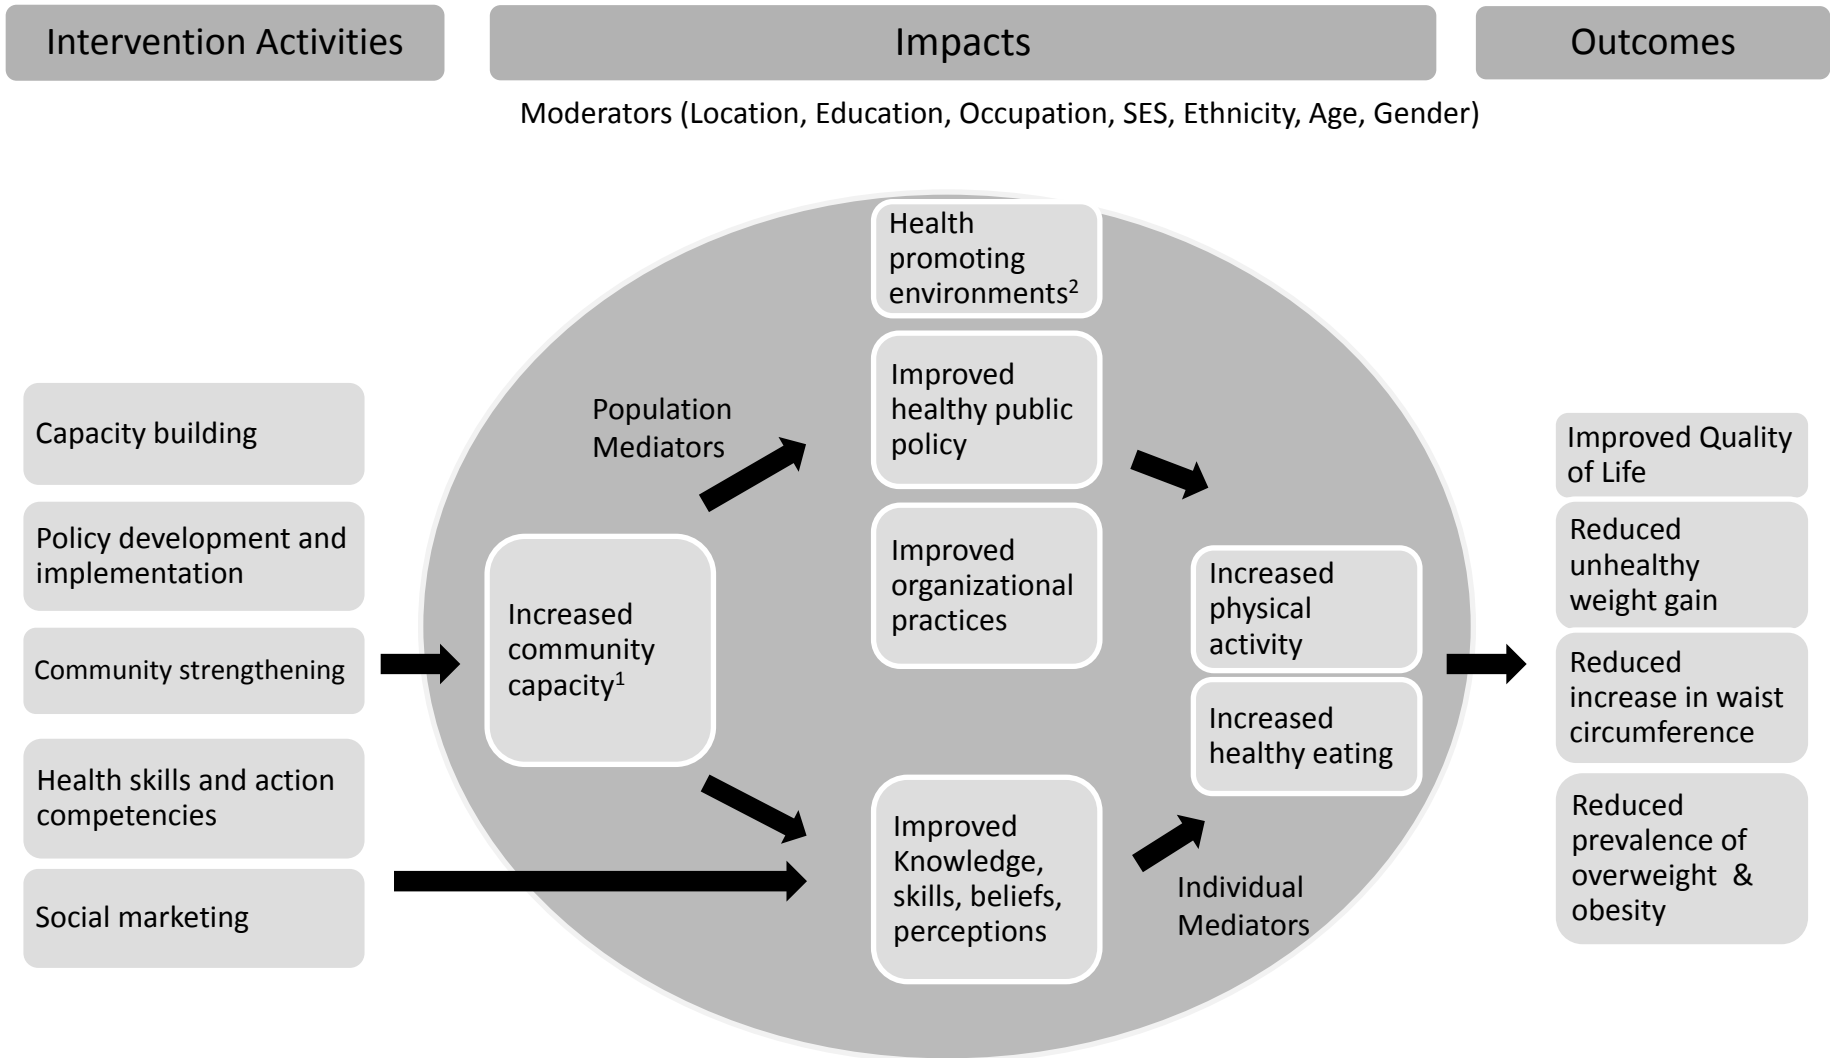

1. Capacity is leadership, skills, knowledge, structures, resources , partnerships

2. Environments (built, social, economic, policy) include community-based organizations, early childhood services, schools, homes, neighborhoods, health services  
 SES: Socio-economic status
